# Supplementary material for: HDAC8 affects MGMT levels in glioblastoma cell lines via interaction with the proteasome receptor ADRM1
Source: PubMed Central journal article supplement (PMC6872666; doi:10.18632/genesandcancer.197), 2019
Supplement: ganc-10-119-s001.pdf [file ganc-10-119-s001.pdf]

## SUPPLEMENTARY DATA

HDAC8 affects MGMT levels in glioblastoma cell lines via interaction with the proteasome receptor  
ADRM1

**Irene Santos-Barriopedro<sup>#</sup>, Yixuan Li, Sonali Bahl and Edward Seto\***

From George Washington Cancer Center, Department of Biochemistry & Molecular Medicine, George Washington University School of Medicine & Health Sciences, Washington, DC 20037, USA

<sup>#</sup>Present address: Department of Molecular Biology, Radboud Institute for Molecular Life Sciences (RIMLS), Radboud University, Nijmegen 6525GA, The Netherlands

\* To whom correspondence should be addressed. Tel: +1 202 994 3156; Email: [seto@gwu.edu](mailto:seto@gwu.edu)

### **Content**

- Figures S1-S6
- Tables S1-S3

**A**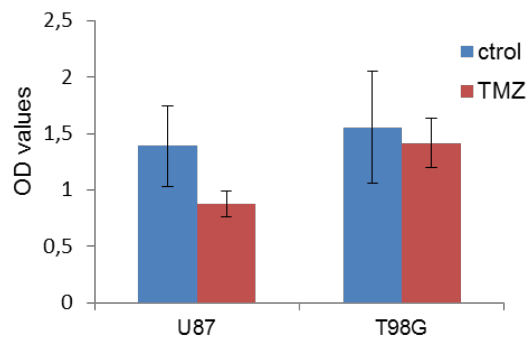**B**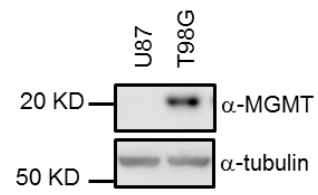

**Figure S1. (A)** Viability of U87 and T98G cells following treatment with TMZ for 3 days was assessed by the CCK-8 assay. **(B)** Extracts of U87 and T98G cells were subjected to Western blotting with MGMT and tubulin antibodies.

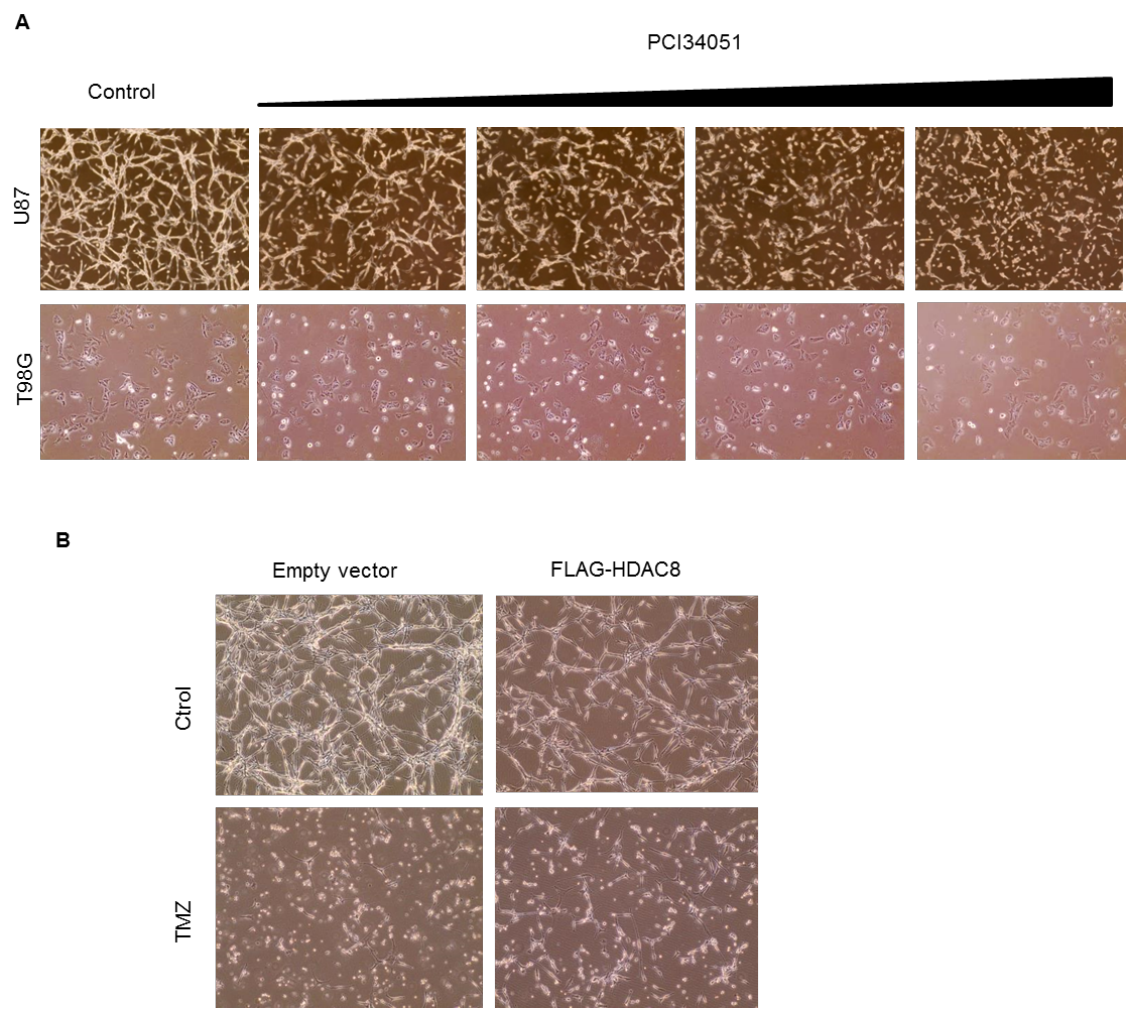

**Figure S2. (A)** Image capture of U87 and T98G cells after treatment with increasing concentrations of PCI34051 for 24 hours. **(B)** Image capture of U87 cells expressing FLAG-HDAC8 and treated with TMZ for 48 hours.

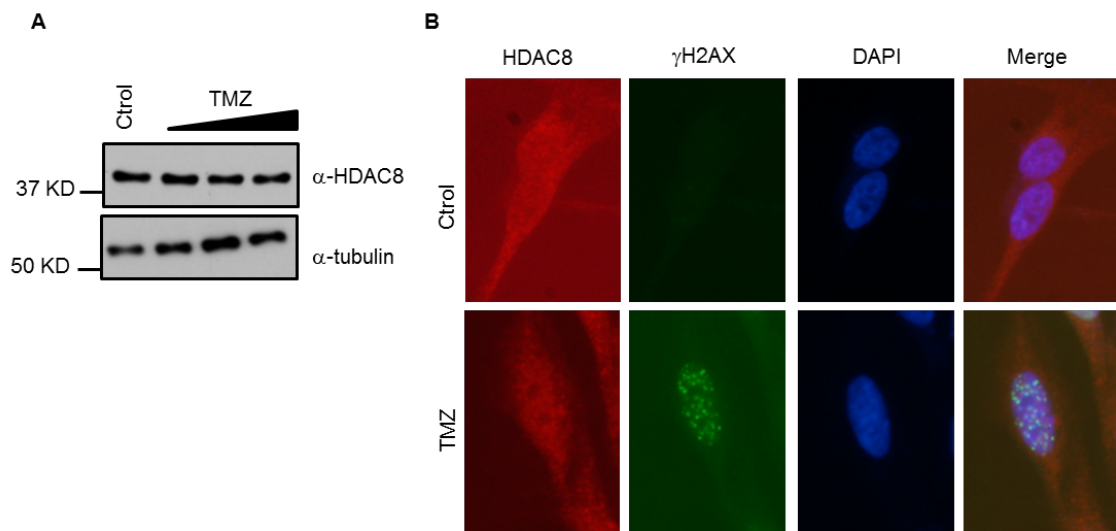

**Figure S3.** (A) Extracts from U87 cells treated with TMZ for 48 hours were subject to Western blotting with HDAC8 and tubulin antibodies. (B) Immunofluorescence to detect HDAC8 and  $\gamma$ H2AX expression in U87 cells treated with TMZ for 48 hours.

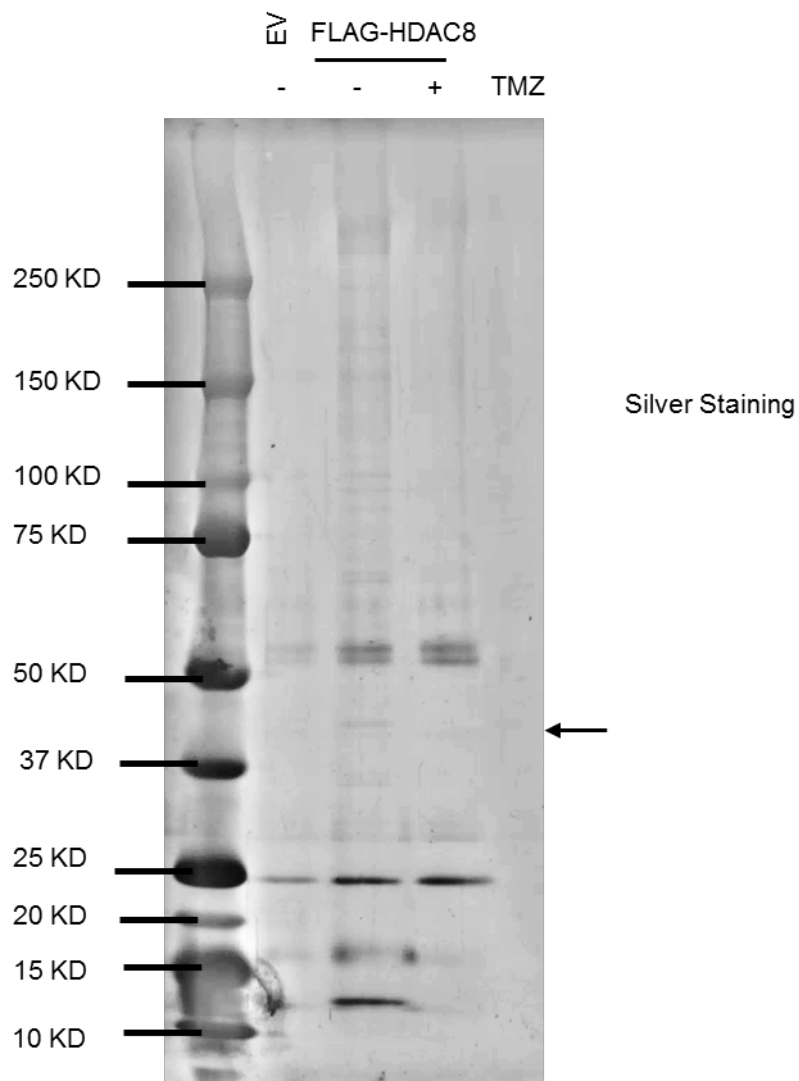

**Figure S4.** Extracts from U87 cells treated with TMZ for 48 hours were immunoprecipitated with a FLAG antibody and subject to Silver staining.

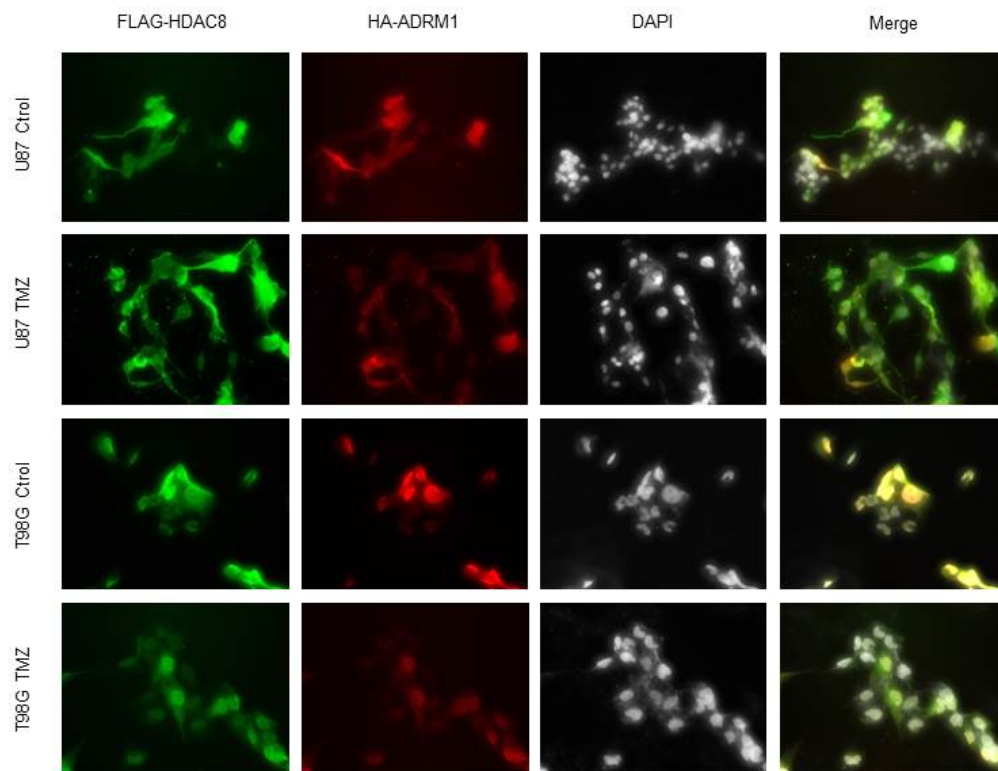

**Figure S5.** Fluorescence image of U87 and T98G cells expressing FLAG-HDAC8 and HA-ADRM1 and treated with TMZ for 48 hours.

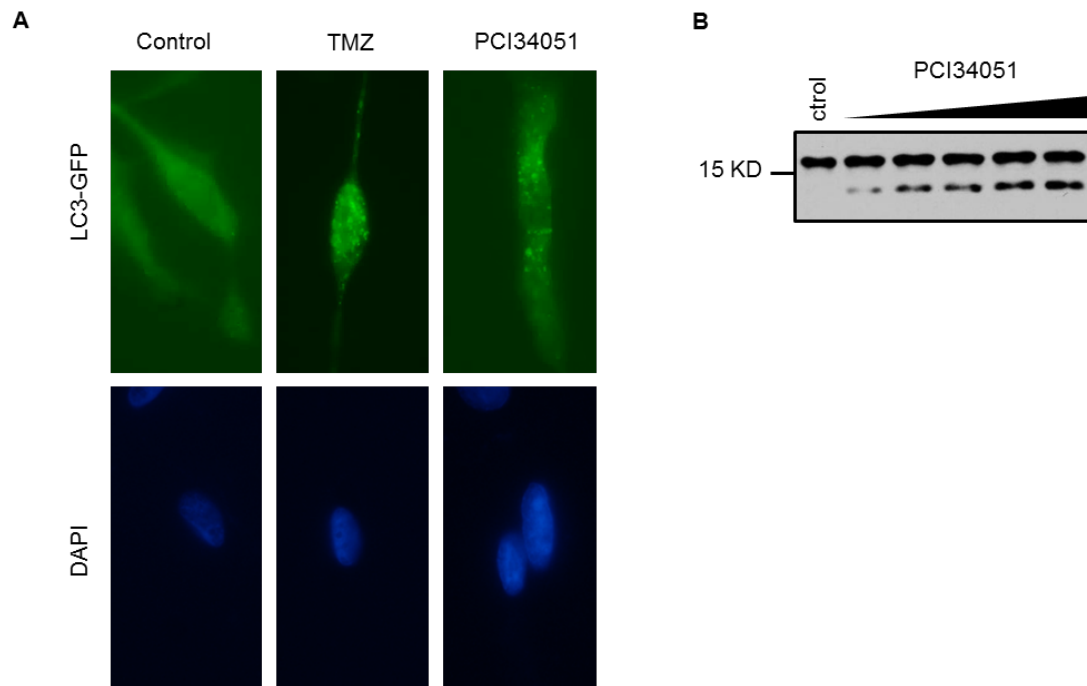

**Figure S6.** (A) Fluorescence image to visualize LC3-GFP expression in U87 cells treated with TMZ and PCI34051 for 24 hours. (B) Extracts of U87 cells treated with PCI34051 for 24 hours were subject to Western blotting with LC3 antibody.

**Table S1. Primers used for subcloning**

|                           |                                       |
|---------------------------|---------------------------------------|
| deltaDEUBADADRM1EcoRI-F   | GGGAATTCGATGACGACCTCAGGCGCGCTCTTTC    |
| deltaDEUBADADRM1BamHI-R   | GGGGATCCTCACAGCTGGATGGGCTGGGTCCGGG    |
| deltaPruADRM1EcoRI-F      | GGGAATTCAGGCGGTGAGGGTGGCCTGCAGAGCC    |
| deltaPruADRM1BamHI-R      | GGGGATCCTCAGTCCAGGCTCATGTCCTC         |
| FLAGMGMTecoRI-F           | GGGAATTCTATGCTGGGACAGCCCGCGCCCCT      |
| FLAGMGMTBamHI-R           | GGGGATCCTCAGTTTCGGCCAGCAGGCG          |
| TAFLAGHDAC8-R             | CTAGACCACATGCTTCAGATTCCCTTTG          |
| TAFLAGHDAC8-F             | ATGGACTACAAAGACCATGACGGTGATTAT        |
| HAHDAC8-EcoRIF            | CCGGAATTCATGGAGGAGCCGGAGGAACCGGCGGAC  |
| HAHDAC8-XhoIR             | CCGCTCGAGCTAGACCACATGCTTCAGATTCCCTTTG |
| HA-ADRM1 BamHI-Fw         | CCGGATCCATGACGACCTCAGGCGCGCTCTTTC     |
| HA-ADRM1XhoI-Rv           | GGCTCGAGTCAGTCCAGGCTCATCTCC           |
| ADRM1TAcloningR           | TCAGTCCAGGCTCATGTCCTC                 |
| HAADRM1 TA cloning F      | ATGGACTACCCTTATGATGTGCCGG             |
| pcDNA3.1mycHisHDAC8XhoI-F | CCCTCGAGATGGAGGAGCCGGAGGAACCGGCG      |
| pcDNA3.1mycHisHDAC8KpnI-R | CCGGTACCGACCACATGCTTCAGATTCCC         |



**Table S2. List of antibodies used for Western blot**

| <b>Protein targeted</b> | <b>Company</b> | <b>Cat. No.</b> | <b>Dilution</b> |
|-------------------------|----------------|-----------------|-----------------|
| HA                      | Sigma          | H9658           | 1:1000          |
| FLAG                    | Sigma          | F3165           | 1:1000          |
| tubulin                 | DSH            | AB_1157911      | 1:5000          |
| vinculin                | Santa Cruz     | sc-73614        | 1:1000          |
| actin                   | Sigma          | A1978           | 1:5000          |
| HDAC8                   | Abcam          | Ab187139        | 1:5000          |
| ADRM1                   | CST            | 12019S          | 1:1000          |
| MGMT                    | Santa Cruz     | sc-166516       | 1:200           |
| PARP                    | CST            | 9532            | 1:1000          |
| Phosphor Cdc2 Y15       | CST            | 4539            | 1:1000          |
| phosphoH3S10            | CST            | 3377            | 1:1000          |
| Cyclin A                | CST            | 4656            | 1:1000          |
| $\gamma$ -H2AX          | Upstate        | 05-636          | 1:1000          |
| H3                      | CST            | 9715            | 1:1000          |
| Phosphor ATM S1981      | CST            | 4526            | 1:1000          |
| ATM                     | Genetex        | GTX70103        | 1:1000          |
| PSMD1                   | Bethyl         | A303-852A-T     | 1:1000          |
| myc                     | CST            | 2276            | 1:1000          |

**Table S3. Primers used for qPCR**

|          |                        |
|----------|------------------------|
| MGMT-F   | AGCTGATGCCGTGGAGGT     |
| MGMT-R   | ACGACTCTTGCTGGAAAACG   |
| hEEF2 F  | TGGAGATCTGCCTGAAGGAC   |
| hEEF2 R  | GACTTGGAGAGGCAGAGAGCAC |
| hNCL-F   | CTGCCTCAGAGGATGAG      |
| hNCL-R   | TCTGTTTGGCCATTCCTTC    |
| hHPRT1-F | TGACACTGGCAAAACAATGCA  |
| hHPRT1-R | GGTCCTTTTCACCAGCAAGCT  |
| HDAC8-F  | GCGTGATTTCCAGCACATAA   |
| HDAC8-R  | ATACTTGACCGGGGTCATCC   |
